# Supplementary material for: A Comparative Study of Poly(Azure A) Film-Modified Disposable Electrodes for Electrocatalytic Oxidation of H2O2: Effect of Doping Anion
Source: Polymers (Basel). 2018 Jan 6;10(1):48. doi: 10.3390/polym10010048 (PMC6414827; doi:10.3390/polym10010048)
Supplement: Supplementary file 1 [file polymers-10-00048-s001.docx]

**Supplementary Materials**

A comparative study of poly(azure A) film-modified disposable electrodes for electrocatalytic oxidation of H2O2: Effect of doping anion

Jerónimo Agrisuelas, María-Isabel González-Sánchez, Beatriz Gómez-Monedero and Edelmira Valero*





Figure S1. Polarization curves of 1 mg·mL−1 azure A in 0.02 M KCl (A) and KNO3 (B) aqueous solutions at scan rate 10 mV·s−1 between −0.25 V and 1 V. The voltammetry cycle stars at 0.5 V.





Figure S2. Calibration straight line of the PAA(DS) obtained from the amperometric response of such electrode upon successive additions of H2O2 in phosphate buffer solution (pH 7) at 0.5 V. The error bars correspond to standard deviations between three replicates using the same electrode.





Figure. S3. Amperometry of the influence of certain compounds measured at 0.5 V. 50 M hydrogen peroxide, 100 M ethanol, 100 M sodium citrate, 100 M glucose, 100 M caffeine and 100 M DHA were added to a stirred solution containing phosphate buffer 0.1 M (pH 7). The inset shows the effect of the addition of 50 M sodium ascorbate compared to the same concentration of hydrogen peroxide.
